# Supplementary material
Source: publisher site journal article supplement (https://www.spandidos-publications.com/1193/downloadSupplementary)

Figure S1. Effects of OGT knockdown on EMT markers in MCF-7 cells transfected with siOGT or siScramble and cultured under monolayer, anoikis resistant and reseeding conditions. (A) Representative westernblots of E-cadherin, N-cadherin,  $\beta$ -catenin, and actin (as a protein loading control). Densitometry analysis of (B) E-cadherin, (C) N-cadherin and (D)  $\beta$ -catenin normalized by  $\beta$ -actin. Data are presented as the mean  $\pm$  standard deviation of three independent experiments.

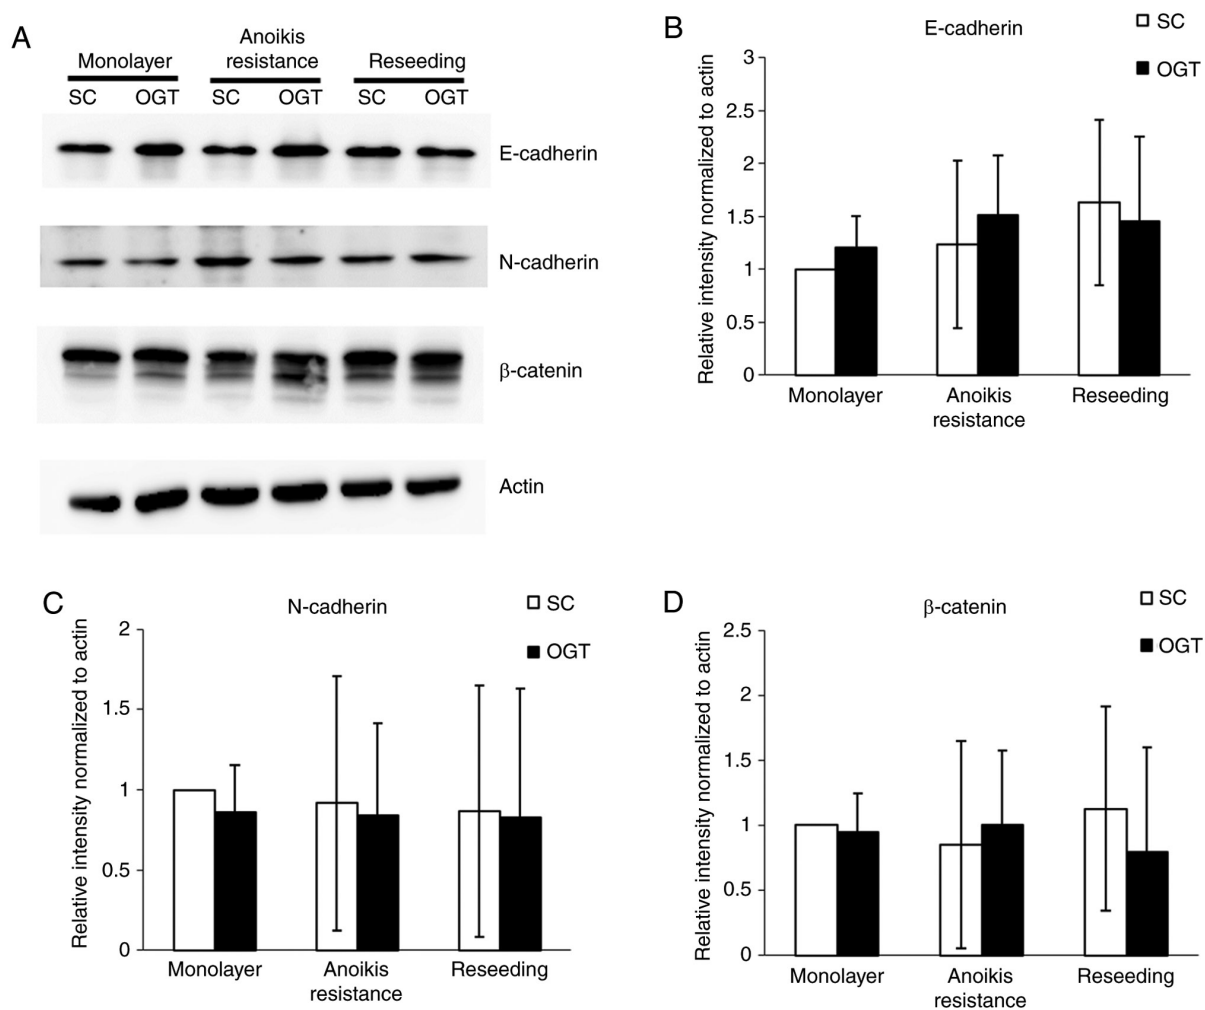

Supplement: Supplementary file 1 [file downloadSupplementary]
